# Supplementary material for: Date Fruit (Phoenix dactylifera L.) Cultivar Extracts: Nanoparticle Synthesis, Antimicrobial and Antioxidant Activities
Source: MDPI journal article supplement (doi:10.3390/molecules27165165), 2022-08-13
Supplement: s1 [file s1]

Supplementary Materials

# Date Fruit (*Phoenix dactylifera* L.) Cultivar Extracts: Nanoparticle Synthesis, Antimicrobial and Antioxidant Activities

Abdulghani Ashraf Halabi <sup>1</sup>, Bassma H. Elwakil <sup>2,\*</sup>, Mohamed Hagar <sup>3</sup> and Zakia A. Olama <sup>1</sup>

<sup>1</sup> Department of Botany & Microbiology, Faculty of Science, Alexandria University, Alexandria 21568, Egypt

<sup>2</sup> Department of Medical Laboratory Technology, Faculty of Applied Health Sciences Technology, Pharos University in Alexandria, Alexandria 21321, Egypt

<sup>3</sup> Department of Chemistry, Faculty of Science, Alexandria University, Alexandria 21568, Egypt

\* Correspondence: bassma.hassan@pua.edu.eg

**Table S1.** Calibration curve of the gallic acid, quercetin and tannic acid

| Concentration of gallic acid, quercetin or tannic acid (µg/ml) | Absorbance of gallic acid | Absorbance of quercetin | Absorbance of tannic acid |
|----------------------------------------------------------------|---------------------------|-------------------------|---------------------------|
| Blank                                                          | 0.152 ± 0.02              | 0.075 ± 0.01            | 0.250 ± 0.10              |
| 0                                                              | 0.000 ± 0.01              | 0.000 ± 0.02            | 0.250 ± 0.09              |
| 20                                                             | 0.170 ± 0.07              | 0.106 ± 0.06            | 0.330 ± 0.11              |
| 40                                                             | 0.218 ± 0.01              | 0.212 ± 0.07            | 0.420 ± 0.19              |
| 60                                                             | 0.255 ± 0.02              | 0.340 ± 0.08            | 0.515 ± 0.21              |
| 80                                                             | 0.305 ± 0.09              | 0.400 ± 0.11            | 0.630 ± 0.11              |
| 100                                                            | 0.355 ± 0.04              | 0.510 ± 0.09            | 0.725 ± 0.32              |
| 200                                                            | 0.372 ± 0.08              | 0.600 ± 0.19            | 0.940 ± 0.39              |

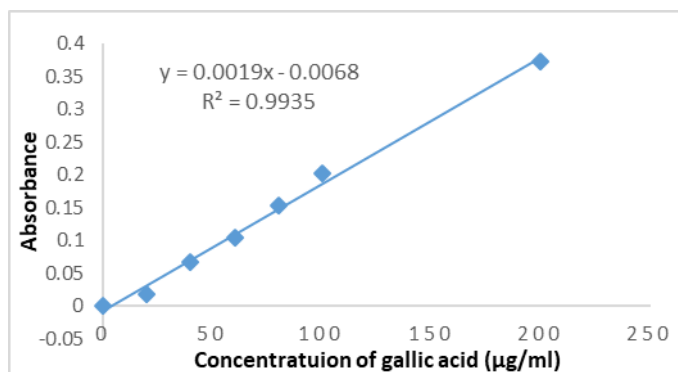

A

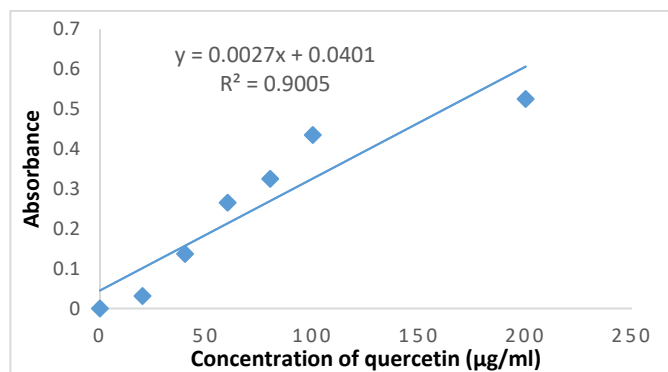

B

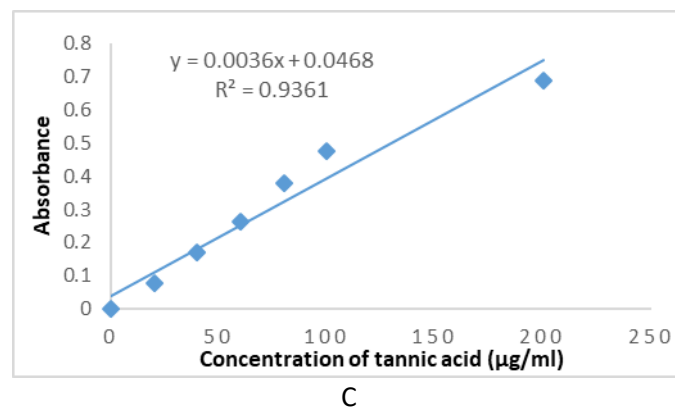

**Figure S1.** Calibration curve of the gallic acid (A), quercetin (B) and tannic acid (C)
